# Supplementary material for: In Vivo Toxicological Profile of Sunset Yellow: Triggers of Mammary Tumorigenesis to Breast Cancer and Biochemical Dysregulation
Source: Research Square preprint supplement (doi:10.21203/rs.3.rs-7495694/v1), 2025-09-09
Supplement: Supplementary file 1 [file 0d3b5cd26ad9392861b2467e.docx]

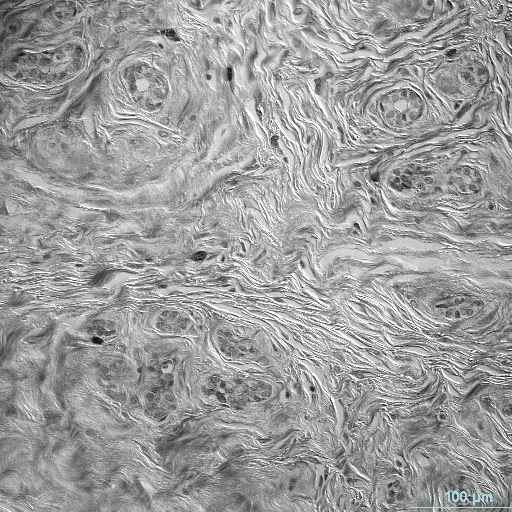

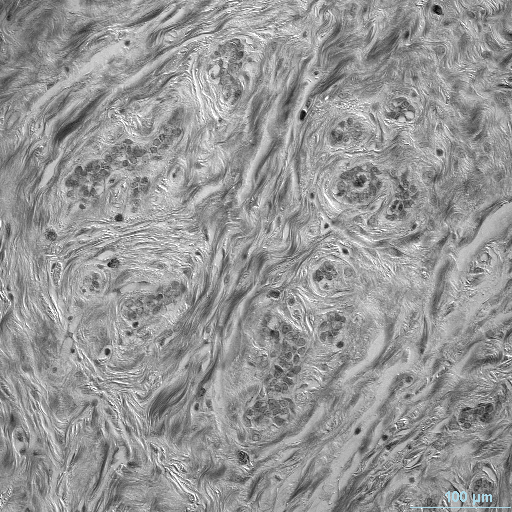

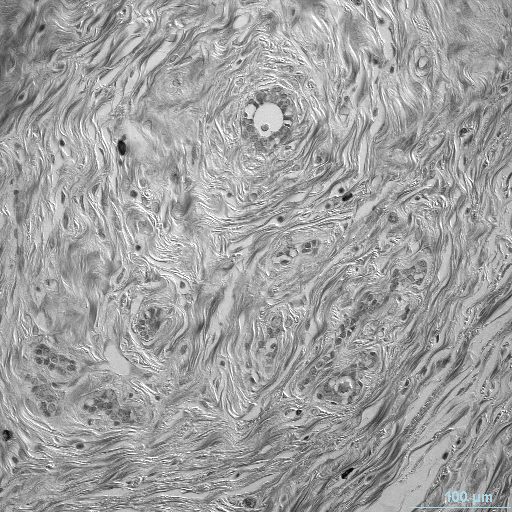

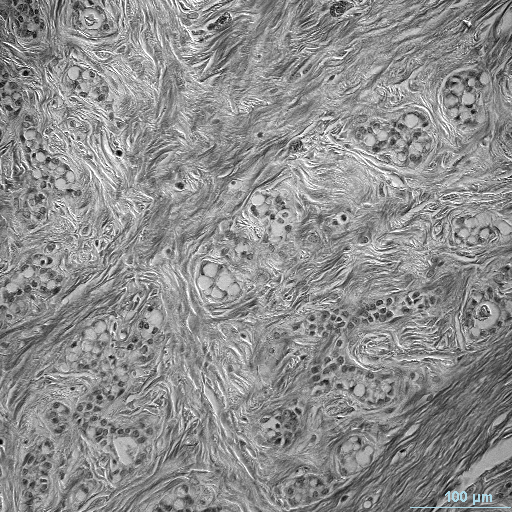


**C**

**D**

**B**

**A**

(A) Positive control animals administered 7,12-dimethylbenz[a]anthracene (DMBA) at 2 mg/kg body weight; and treatment groups receiving Sunset Yellow at doses of (B) 200 mg/kg, (C) 400 mg/kg, and (D) 600 mg/kg body weight, respectively.


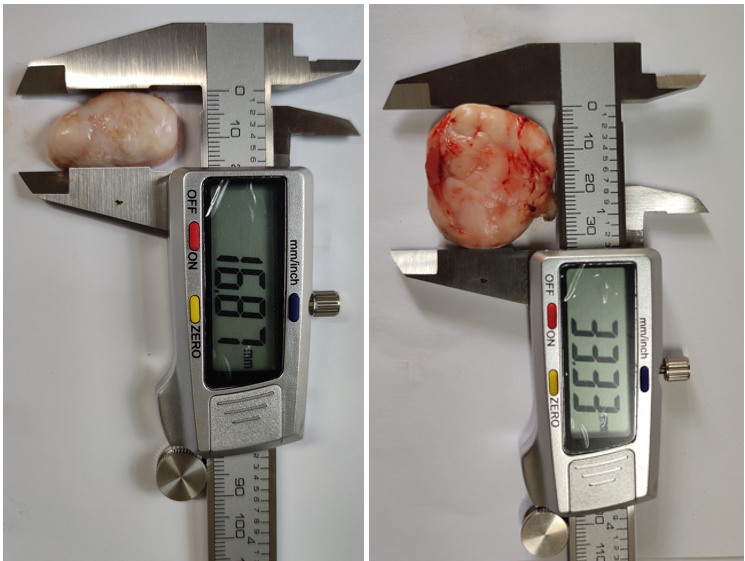


**B**

**A**

Treatment groups receiving Sunset Yellow at doses of (A) 200, 400, and 600 mg/kg body weight, respectively. (B) Positive control animals administered 7,12-dimethylbenz[a]anthracene (DMBA) at 2 mg/kg body weight;
